# Supplementary material
Source: publisher site journal article supplement (https://www.dovepress.com/article/351546)
Supplement: Supplementary file 1 [file get_supplementary_file.php]

**Supplementary Figure 1** Examples of screens available in Reuma.pt/SAID – General patient data


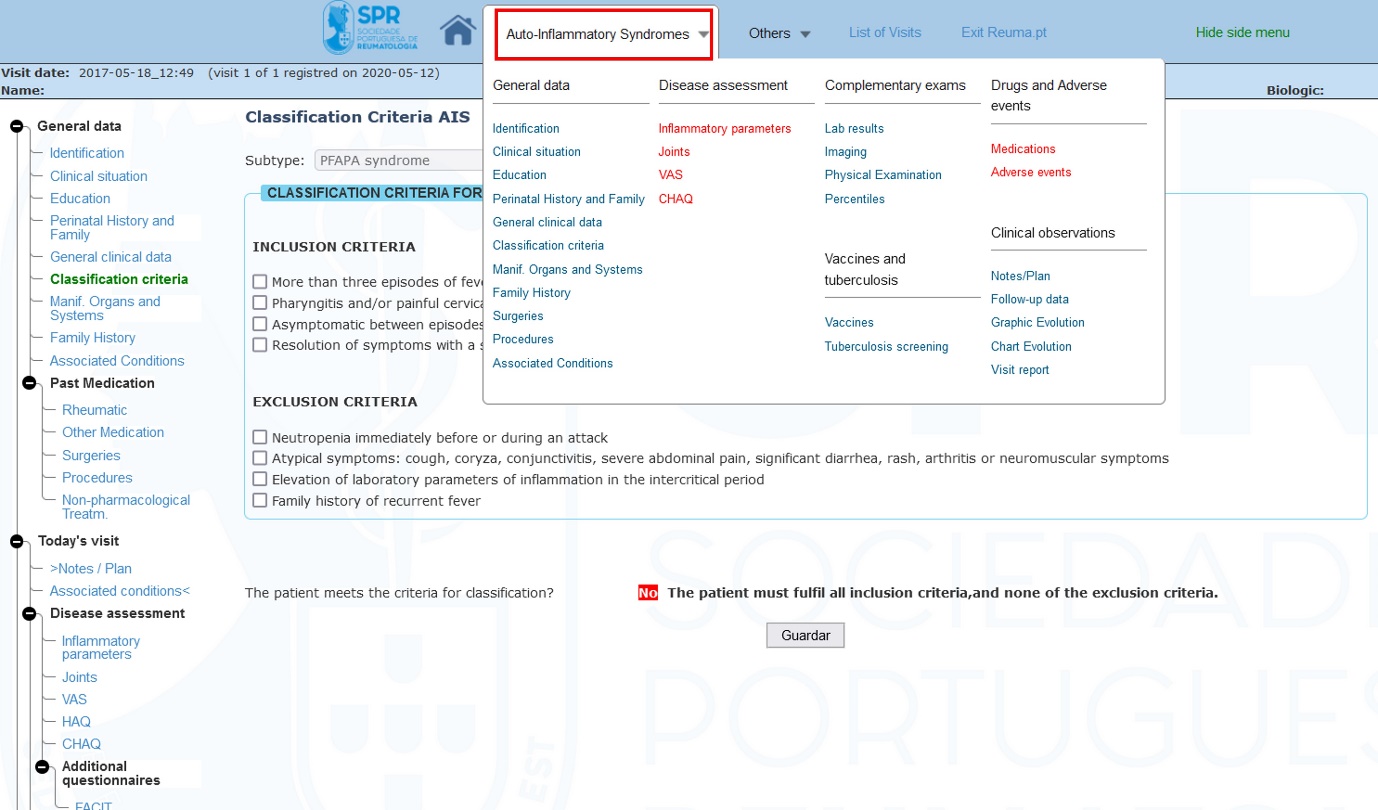


**Supplementary Figure 2** Examples of screens available in Reuma.pt/SAID – General clinical data

**
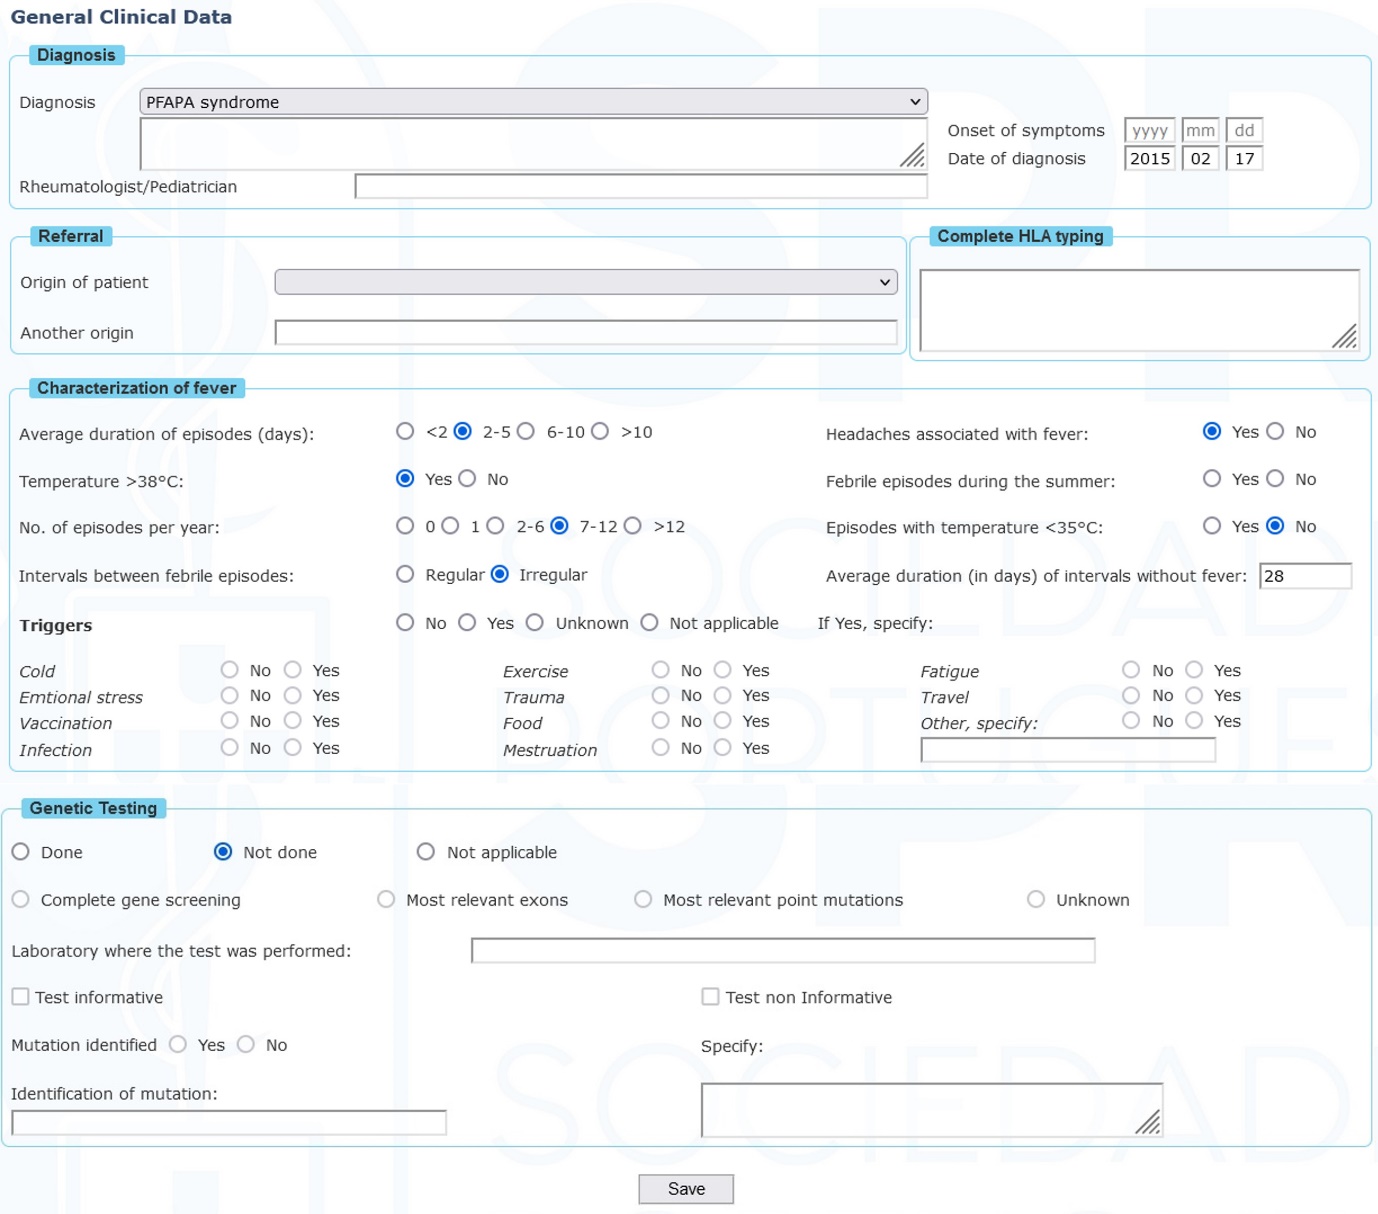
**

**Supplementary Figure 3** Examples of screens available in Reuma.pt/SAID – Classification criteria

**
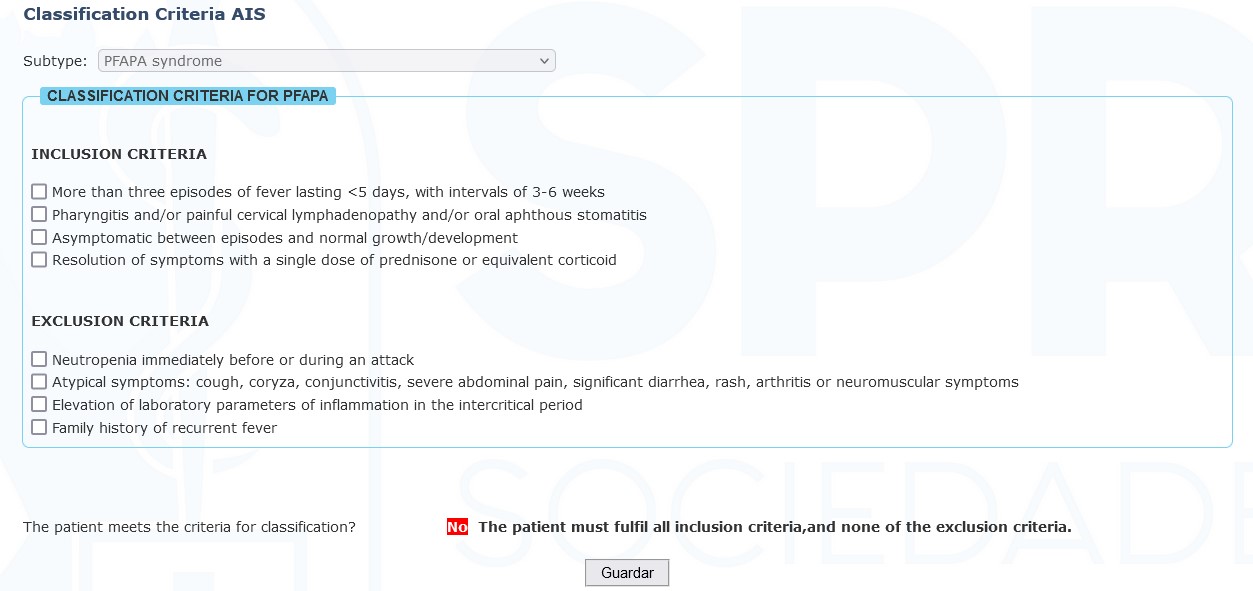
**

**Supplementary Figure 4** Examples of screens available in Reuma.pt/SAID – Manifestations of organs and systems

**
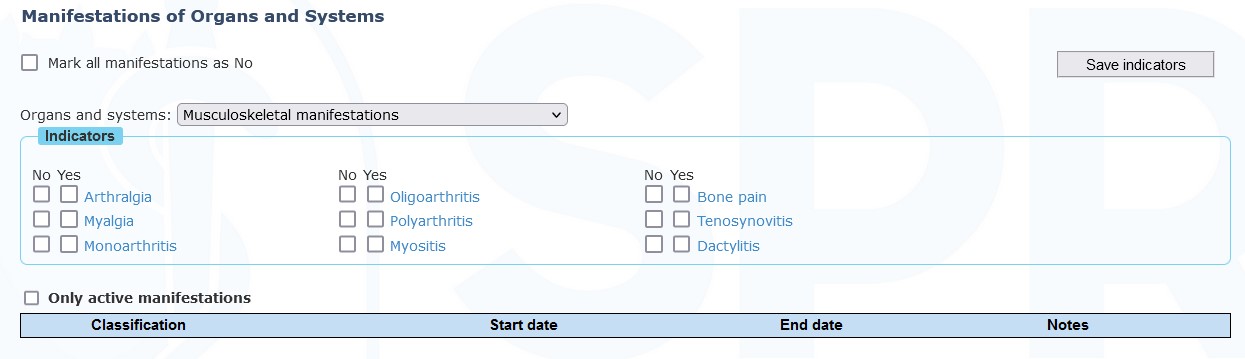
**

**Supplementary Figure 5** Examples of screens available in Reuma.pt/SAID – Disease activity: Joints affected

**
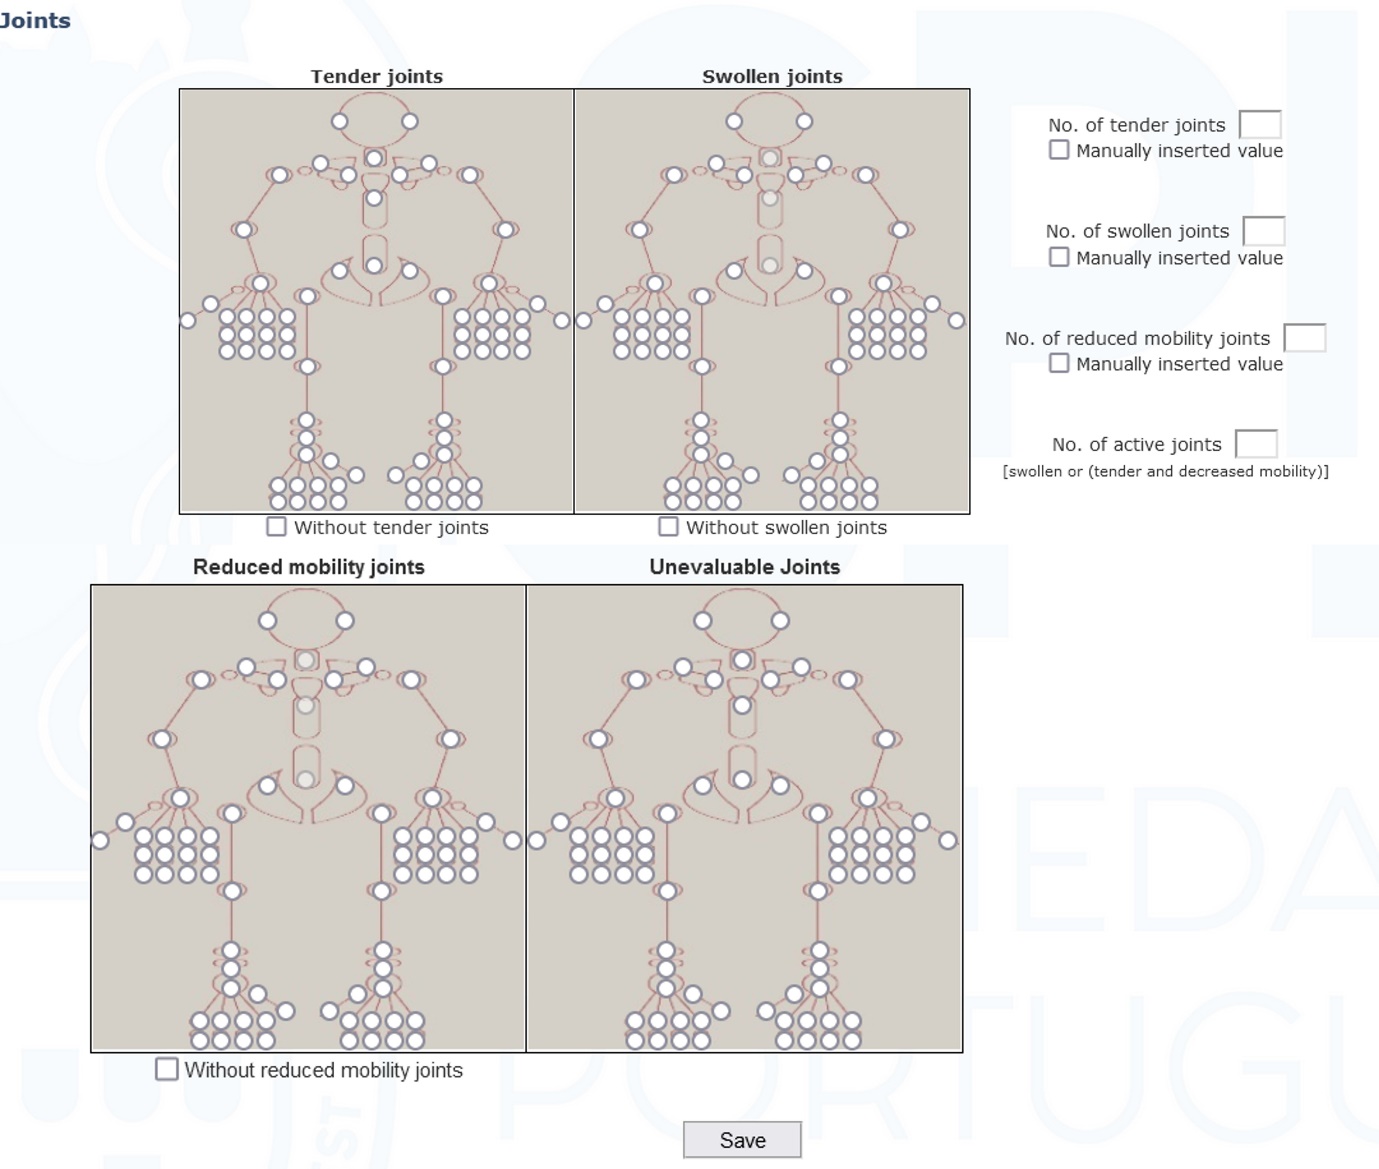
**


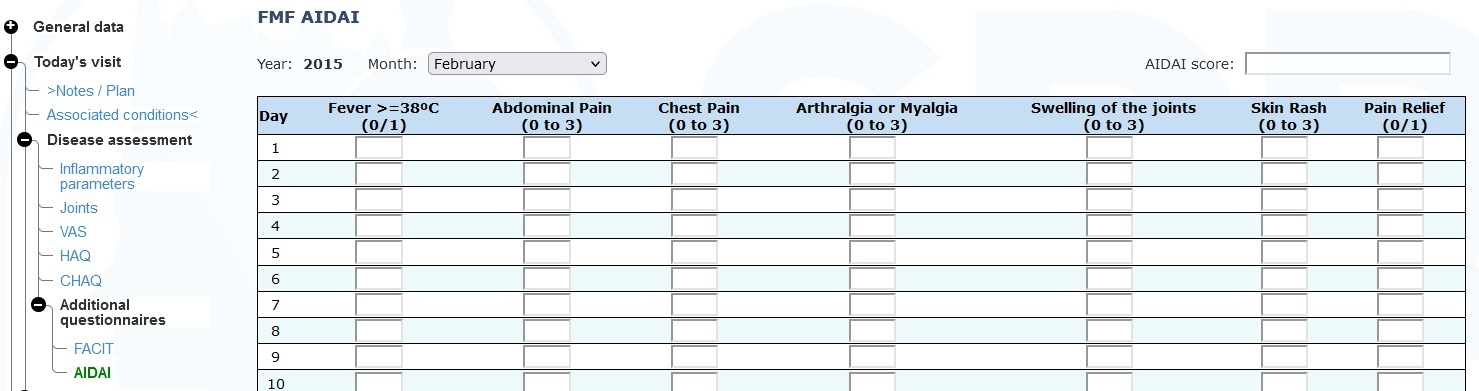
**Supplementary Figure 6** Examples of screens available in Reuma.pt/SAID – Disease activity: AIDAI score

**Supplementary Figure 7** Examples of screens available in Reuma.pt/SAID – Disease activity: Inflammatory parameters


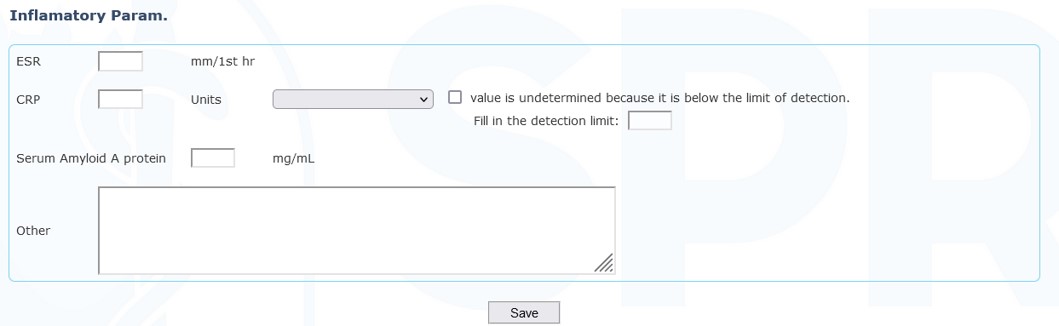


**Supplementary Figure 8** Examples of screens available in Reuma.pt/SAID – Therapy

**
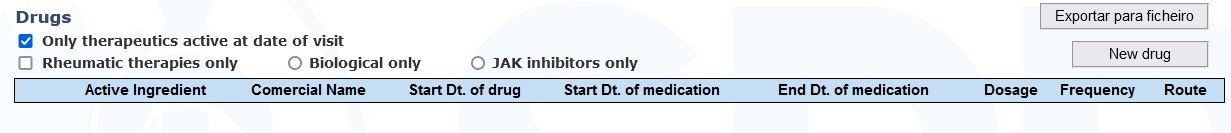
**
